# Supplementary material for: Homogeneous versus Inhomogeneous Polarization Switching in PZT Thin Films: Impact of the Structural Quality and Correlation to the Negative Capacitance Effect
Source: MDPI journal article supplement (doi:10.3390/nano11082124), 2021-08-20
Supplement: s1 [file s1]

## Supplementary Materials

# Homogeneous versus Inhomogeneous Polarization Switching in PZT Thin Films: Impact of the Structural Quality and Correlation to the Negative Capacitance Effect

Lucian Pintilie \*, Georgia Andra Boni, Cristina Florentina Chirila, Viorica Stancu, Lucian Trupina, Cosmin Marian Istrate, Cristian Radu and Ioana Pintilie

National Institute of Materials Physics, Atomistilor 405A, 077125 Magurele, Romania; andra.boni@infim.ro (G.A.B.); dragoi@infim.ro (C.F.C.); stancu@infim.ro (V.S.); Lucian.Trupina@infim.ro (L.T.); cosmin.istrate@infim.ro (C.M.I.); cristian.radu@infim.ro (C.R.); ioana@infim.ro (I.P.)

\* Correspondence: pintilie@infim.ro

### 1. TEM studies

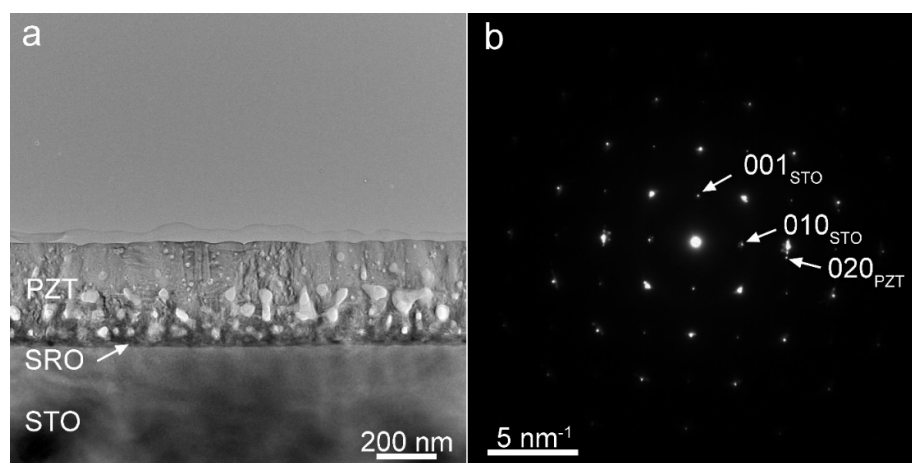

**Figure S1.** (a) TEM image at low magnification of the PZT/SRO/STO structure and (b) the corresponding SAED pattern from an area which include both the substrate and the thin films.

### 2. PFM studies

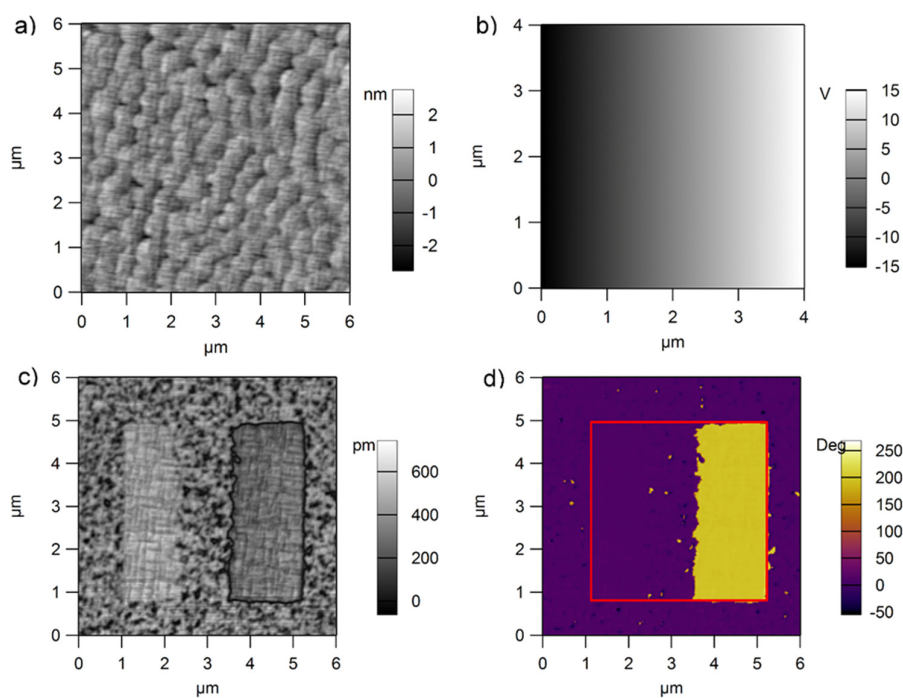

**Figure S2.** Topography (a), poling map (b) amplitude (c) and phase (d) of the PFM signal obtained after poling in the case of the PZT films deposited from the in-house made, pure target on single crystal STO substrate with bottom SRO electrode.

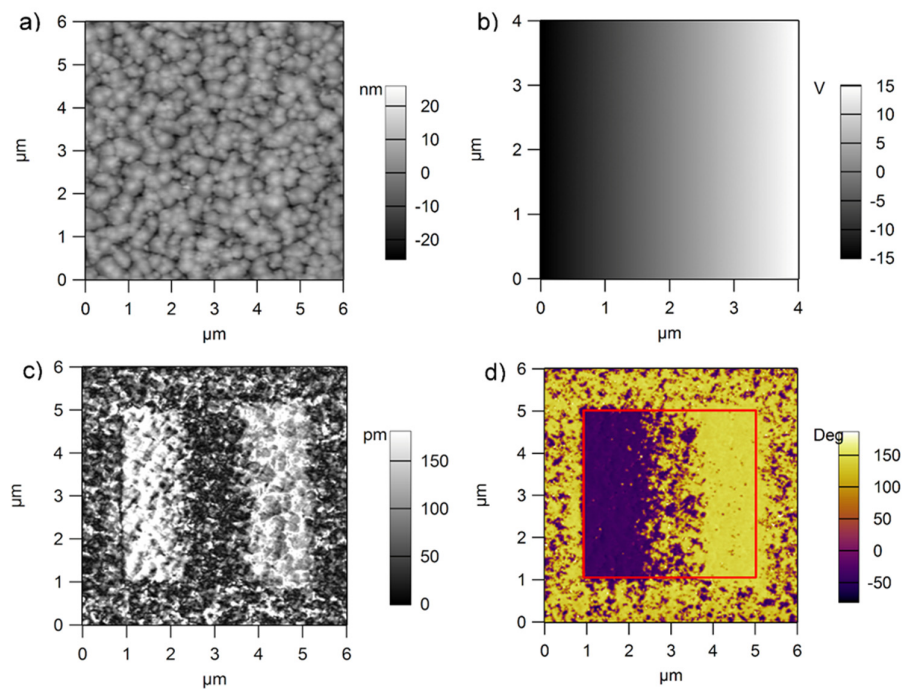

**Figure S3.** Topography (a), poling map (b) amplitude (c) and phase (d) of the PFM signal obtained after poling in the case of the PZT films deposited by sol-gel on single crystal STO substrate with bottom SRO electrode.
